# Supplementary material for: A fluorescent probe for detection of Hg2+ ions constructed by tetramethyl cucurbit[6]uril and 1,2-bis(4-pyridyl)ethene
Source: publisher site journal article supplement (doi:10.3762/bjoc.19.63), 2023-06-13

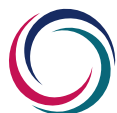

## Supporting Information

for

### **A fluorescent probe for detection of Hg<sup>2+</sup> ions constructed by tetramethyl cucurbit[6]uril and 1,2-bis(4-pyridyl)ethene**

Xiaoqian Chen, Naqin Yang, Yue Ma, Xinan Yang and Peihua Ma

*Beilstein J. Org. Chem.* **2023**, *19*, 864–872. [doi:10.3762/bjoc.19.63](https://doi.org/10.3762/bjoc.19.63)

**CheckCIF/PLATON report for the cif file of G@TMeQ[6]**

## checkCIF/PLATON report

You have not supplied any structure factors. As a result the full set of tests cannot be run.

THIS REPORT IS FOR GUIDANCE ONLY. IF USED AS PART OF A REVIEW PROCEDURE FOR PUBLICATION, IT SHOULD NOT REPLACE THE EXPERTISE OF AN EXPERIENCED CRYSTALLOGRAPHIC REFEREE.

No syntax errors found.      CIF dictionary      Interpreting this report

### Datablock: a\_sq

---

|                        |                                                                     |                                                       |                 |
|------------------------|---------------------------------------------------------------------|-------------------------------------------------------|-----------------|
| Bond precision:        | C-C = 0.0090 A                                                      | Wavelength=0.71073                                    |                 |
| Cell:                  | a=12.739(4)                                                         | b=12.887(4)                                           | c=13.181(4)     |
|                        | alpha=84.385(9)                                                     | beta=78.229(9)                                        | gamma=60.825(7) |
| Temperature:           | 290 K                                                               |                                                       |                 |
|                        | Calculated                                                          | Reported                                              |                 |
| Volume                 | 1849.6(10)                                                          | 1849.6(9)                                             |                 |
| Space group            | P -1                                                                | P -1                                                  |                 |
| Hall group             | -P 1                                                                | -P 1                                                  |                 |
| Moiety formula         | C40 H44 N24 O12, C12 H12<br>N2, 2(C14 Zn), 1.4(H2 O) [+<br>solvent] | 2(C14 Zn), C40 H44 N24 O12,<br>C12 H12 N2, 1.4(H2 O1) |                 |
| Sum formula            | C52 H58.80 C18 N26 O13.40<br>Zn2 [+ solvent]                        | C52 H58.80 C18 N26 O13.40<br>Zn2                      |                 |
| Mr                     | 1676.42                                                             | 1676.79                                               |                 |
| Dx, g cm <sup>-3</sup> | 1.505                                                               | 1.505                                                 |                 |
| Z                      | 1                                                                   | 1                                                     |                 |
| Mu (mm <sup>-1</sup> ) | 1.011                                                               | 1.012                                                 |                 |
| F000                   | 855.8                                                               | 856.0                                                 |                 |
| F000'                  | 857.82                                                              |                                                       |                 |
| h, k, lmax             | 15, 15, 15                                                          | 15, 15, 15                                            |                 |
| Nref                   | 6530                                                                | 6462                                                  |                 |
| Tmin, Tmax             | 0.776, 0.886                                                        | 0.585, 0.745                                          |                 |
| Tmin'                  | 0.776                                                               |                                                       |                 |

Correction method= # Reported T Limits: Tmin=0.585 Tmax=0.745  
AbsCorr = MULTII-SCAN

Data completeness= 0.990

Theta(max)= 25.026

R(reflections)= 0.1269( 4108)

wR2(reflections)=  
0.4519( 6462)

S = 1.160

Npar= 593

---

The following ALERTS were generated. Each ALERT has the format

**test-name\_ALERT\_alert-type\_alert-level.**

Click on the hyperlinks for more details of the test.

---

 **Alert level B**

PLAT084\_ALERT\_3\_B High wR2 Value (i.e. > 0.25) ..... 0.45 Report

---

 **Alert level C**

PLAT077\_ALERT\_4\_C Unitcell Contains Non-integer Number of Atoms .. Please Check  
PLAT082\_ALERT\_2\_C High R1 Value ..... 0.13 Report  
PLAT260\_ALERT\_2\_C Large Average Ueq of Residue Including Zn1 0.111 Check  
PLAT260\_ALERT\_2\_C Large Average Ueq of Residue Including Zn1A 0.114 Check  
PLAT260\_ALERT\_2\_C Large Average Ueq of Residue Including Zn1B 0.114 Check  
PLAT260\_ALERT\_2\_C Large Average Ueq of Residue Including O01E 0.152 Check  
PLAT341\_ALERT\_3\_C Low Bond Precision on C-C Bonds ..... 0.009 Ang.  
PLAT420\_ALERT\_2\_C D-H Bond Without Acceptor N017 --H01P . Please Check

---

 **Alert level G**

PLAT002\_ALERT\_2\_G Number of Distance or Angle Restraints on AtSite 5 Note  
PLAT003\_ALERT\_2\_G Number of Uiso or Uij Restrained non-H Atoms ... 29 Report  
PLAT007\_ALERT\_5\_G Number of Unrefined Donor-H Atoms ..... 4 Report  
PLAT042\_ALERT\_1\_G Calc. and Reported MoietyFormula Strings Differ Please Check  
PLAT072\_ALERT\_2\_G SHELXL First Parameter in WGHT Unusually Large 0.33 Report  
PLAT172\_ALERT\_4\_G The CIF-Embedded .res File Contains DFIX Records 1 Report  
PLAT178\_ALERT\_4\_G The CIF-Embedded .res File Contains SIMU Records 2 Report  
PLAT187\_ALERT\_4\_G The CIF-Embedded .res File Contains RIGU Records 1 Report  
PLAT188\_ALERT\_3\_G A Non-default SIMU Restraint Value has been used 0.0050 Report  
PLAT188\_ALERT\_3\_G A Non-default SIMU Restraint Value has been used 0.0100 Report  
PLAT190\_ALERT\_3\_G A Non-default RIGU Restraint Value for First Par 0.0100 Report  
PLAT190\_ALERT\_3\_G A Non-default RIGU Restraint Value for SecondPar 0.0200 Report  
PLAT300\_ALERT\_4\_G Atom Site Occupancy of N13 Constrained at 0.5 Check  
PLAT300\_ALERT\_4\_G Atom Site Occupancy of N017 Constrained at 0.5 Check  
PLAT300\_ALERT\_4\_G Atom Site Occupancy of C1 Constrained at 0.5 Check  
PLAT300\_ALERT\_4\_G Atom Site Occupancy of C4 Constrained at 0.5 Check  
PLAT300\_ALERT\_4\_G Atom Site Occupancy of C9 Constrained at 0.5 Check  
PLAT300\_ALERT\_4\_G Atom Site Occupancy of C10 Constrained at 0.5 Check  
PLAT300\_ALERT\_4\_G Atom Site Occupancy of C017 Constrained at 0.5 Check  
PLAT300\_ALERT\_4\_G Atom Site Occupancy of C01J Constrained at 0.5 Check  
PLAT300\_ALERT\_4\_G Atom Site Occupancy of C01F Constrained at 0.5 Check  
PLAT300\_ALERT\_4\_G Atom Site Occupancy of C24 Constrained at 0.5 Check  
PLAT300\_ALERT\_4\_G Atom Site Occupancy of C01I Constrained at 0.5 Check  
PLAT300\_ALERT\_4\_G Atom Site Occupancy of C01D Constrained at 0.5 Check  
PLAT300\_ALERT\_4\_G Atom Site Occupancy of C01G Constrained at 0.5 Check  
PLAT300\_ALERT\_4\_G Atom Site Occupancy of C018 Constrained at 0.5 Check  
PLAT300\_ALERT\_4\_G Atom Site Occupancy of H1 Constrained at 0.5 Check  
PLAT300\_ALERT\_4\_G Atom Site Occupancy of H22 Constrained at 0.5 Check  
PLAT300\_ALERT\_4\_G Atom Site Occupancy of H25 Constrained at 0.5 Check  
PLAT300\_ALERT\_4\_G Atom Site Occupancy of H01L Constrained at 0.5 Check

|                   |                                                  |                |       |        |
|-------------------|--------------------------------------------------|----------------|-------|--------|
| PLAT300_ALERT_4_G | Atom Site Occupancy of H26                       | Constrained at | 0.5   | Check  |
| PLAT300_ALERT_4_G | Atom Site Occupancy of H01M                      | Constrained at | 0.5   | Check  |
| PLAT300_ALERT_4_G | Atom Site Occupancy of H27                       | Constrained at | 0.5   | Check  |
| PLAT300_ALERT_4_G | Atom Site Occupancy of H01N                      | Constrained at | 0.5   | Check  |
| PLAT300_ALERT_4_G | Atom Site Occupancy of H01P                      | Constrained at | 0.5   | Check  |
| PLAT300_ALERT_4_G | Atom Site Occupancy of H018                      | Constrained at | 0.5   | Check  |
| PLAT300_ALERT_4_G | Atom Site Occupancy of H30                       | Constrained at | 0.5   | Check  |
| PLAT300_ALERT_4_G | Atom Site Occupancy of H31                       | Constrained at | 0.5   | Check  |
| PLAT300_ALERT_4_G | Atom Site Occupancy of O01E                      | Constrained at | 0.7   | Check  |
| PLAT300_ALERT_4_G | Atom Site Occupancy of H01Q                      | Constrained at | 0.7   | Check  |
| PLAT300_ALERT_4_G | Atom Site Occupancy of H01R                      | Constrained at | 0.7   | Check  |
| PLAT302_ALERT_4_G | Anion/Solvent/Minor-Residue Disorder (Resd 2 )   |                | 100%  | Note   |
| PLAT302_ALERT_4_G | Anion/Solvent/Minor-Residue Disorder (Resd 3 )   |                | 100%  | Note   |
| PLAT302_ALERT_4_G | Anion/Solvent/Minor-Residue Disorder (Resd 4 )   |                | 100%  | Note   |
| PLAT302_ALERT_4_G | Anion/Solvent/Minor-Residue Disorder (Resd 5 )   |                | 100%  | Note   |
| PLAT302_ALERT_4_G | Anion/Solvent/Minor-Residue Disorder (Resd 6 )   |                | 100%  | Note   |
| PLAT304_ALERT_4_G | Non-Integer Number of Atoms in ..... (Resd 3 )   |                | 2.09  | Check  |
| PLAT304_ALERT_4_G | Non-Integer Number of Atoms in ..... (Resd 4 )   |                | 1.56  | Check  |
| PLAT304_ALERT_4_G | Non-Integer Number of Atoms in ..... (Resd 5 )   |                | 1.35  | Check  |
| PLAT304_ALERT_4_G | Non-Integer Number of Atoms in ..... (Resd 6 )   |                | 2.10  | Check  |
| PLAT432_ALERT_2_G | Short Inter X...Y Contact C12 ..C00S .           |                | 3.24  | Ang.   |
|                   |                                                  | -x,1-y,1-z =   | 2_566 | Check  |
| PLAT432_ALERT_2_G | Short Inter X...Y Contact C12B ..C00R .          |                | 3.23  | Ang.   |
|                   |                                                  | 1+x,y,-1+z =   | 1_654 | Check  |
| PLAT432_ALERT_2_G | Short Inter X...Y Contact C14B ..C010 .          |                | 3.21  | Ang.   |
|                   |                                                  | x,y,z =        | 1_555 | Check  |
| PLAT432_ALERT_2_G | Short Inter X...Y Contact O5 ..C24 .             |                | 2.96  | Ang.   |
|                   |                                                  | 1+x,y,z =      | 1_655 | Check  |
| PLAT432_ALERT_2_G | Short Inter X...Y Contact C000 ..C10 .           |                | 3.15  | Ang.   |
|                   |                                                  | x,y,z =        | 1_555 | Check  |
| PLAT605_ALERT_4_G | Largest Solvent Accessible VOID in the Structure |                | 114   | A**3   |
| PLAT720_ALERT_4_G | Number of Unusual/Non-Standard Labels .....      |                | 70    | Note   |
| PLAT789_ALERT_4_G | Atoms with Negative _atom_site_disorder_group #  |                | 26    | Check  |
| PLAT790_ALERT_4_G | Centre of Gravity not Within Unit Cell: Resd. #  |                | 2     | Note   |
|                   | C12 H12 N2                                       |                |       |        |
| PLAT790_ALERT_4_G | Centre of Gravity not Within Unit Cell: Resd. #  |                | 6     | Note   |
|                   | H2 O                                             |                |       |        |
| PLAT811_ALERT_5_G | No ADDSYM Analysis: Too Many Excluded Atoms .... |                |       | ! Info |
| PLAT822_ALERT_4_G | CIF-embedded .res Contains Negative PART Numbers |                | 2     | Check  |
| PLAT860_ALERT_3_G | Number of Least-Squares Restraints .....         |                | 229   | Note   |
| PLAT869_ALERT_4_G | ALERTS Related to the Use of SQUEEZE Suppressed  |                |       | ! Info |
| PLAT933_ALERT_2_G | Number of HKL-OMIT Records in Embedded .res File |                | 7     | Note   |
| PLAT941_ALERT_3_G | Average HKL Measurement Multiplicity .....       |                | 2.8   | Low    |

---

0 **ALERT level A** = Most likely a serious problem - resolve or explain  
1 **ALERT level B** = A potentially serious problem, consider carefully  
8 **ALERT level C** = Check. Ensure it is not caused by an omission or oversight  
66 **ALERT level G** = General information/check it is not something unexpected

1 ALERT type 1 CIF construction/syntax error, inconsistent or missing data  
15 ALERT type 2 Indicator that the structure model may be wrong or deficient  
8 ALERT type 3 Indicator that the structure quality may be low  
49 ALERT type 4 Improvement, methodology, query or suggestion  
2 ALERT type 5 Informative message, check

---

It is advisable to attempt to resolve as many as possible of the alerts in all categories. Often the minor alerts point to easily fixed oversights, errors and omissions in your CIF or refinement strategy, so attention to these fine details can be worthwhile. In order to resolve some of the more serious problems it may be necessary to carry out additional measurements or structure refinements. However, the purpose of your study may justify the reported deviations and the more serious of these should normally be commented upon in the discussion or experimental section of a paper or in the "special\_details" fields of the CIF. checkCIF was carefully designed to identify outliers and unusual parameters, but every test has its limitations and alerts that are not important in a particular case may appear. Conversely, the absence of alerts does not guarantee there are no aspects of the results needing attention. It is up to the individual to critically assess their own results and, if necessary, seek expert advice.

### **Publication of your CIF in IUCr journals**

A basic structural check has been run on your CIF. These basic checks will be run on all CIFs submitted for publication in IUCr journals (*Acta Crystallographica*, *Journal of Applied Crystallography*, *Journal of Synchrotron Radiation*); however, if you intend to submit to *Acta Crystallographica Section C* or *E* or *IUCrData*, you should make sure that full publication checks are run on the final version of your CIF prior to submission.

### **Publication of your CIF in other journals**

Please refer to the *Notes for Authors* of the relevant journal for any special instructions relating to CIF submission.

---

**PLATON version of 10/05/2023; check.def file version of 10/05/2023**

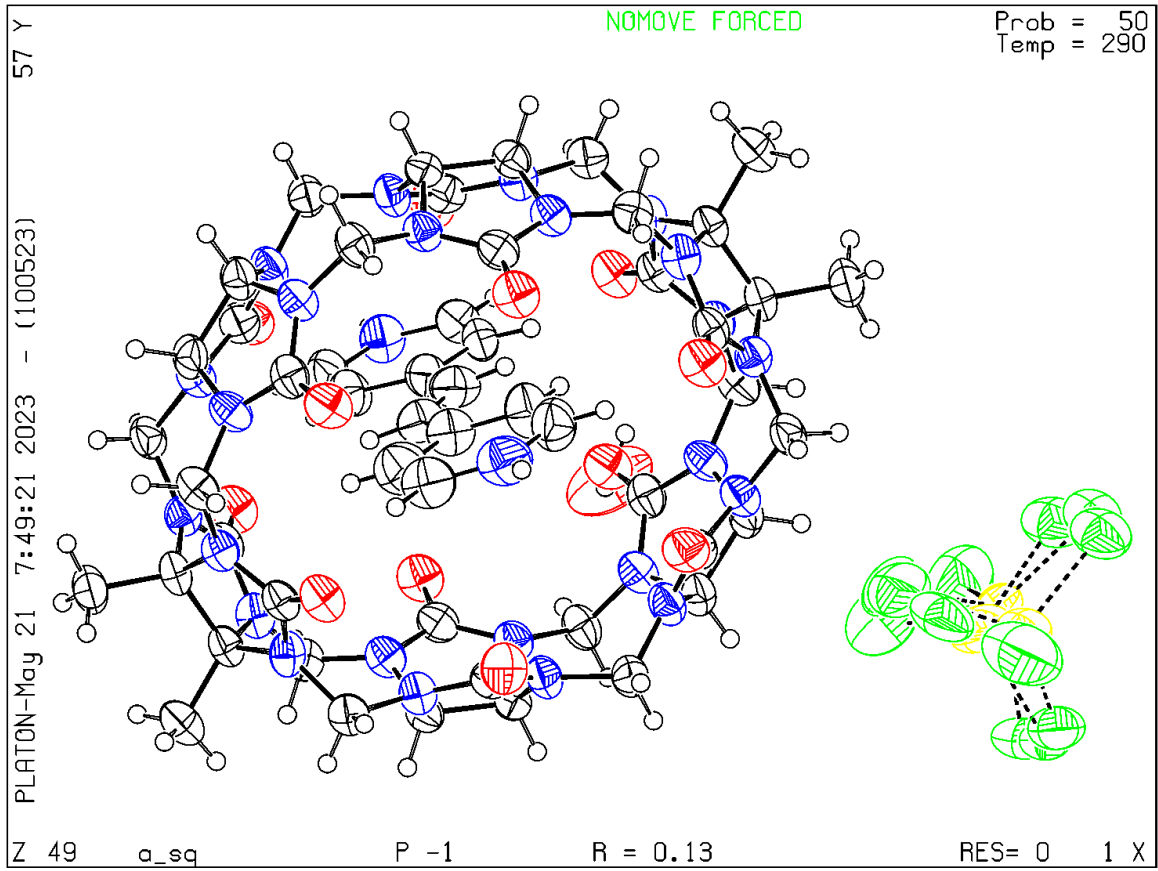

Supplement: Additional file 3 [file 1860-5397-19-63-S3.pdf]
