# Supplementary material for: A fluorescent probe for detection of Hg2+ ions constructed by tetramethyl cucurbit[6]uril and 1,2-bis(4-pyridyl)ethene
Source: publisher site journal article supplement (doi:10.3762/bjoc.19.63), 2023-06-13
Supplement: Additional file 1 [file 1860-5397-19-63-S1.pdf]

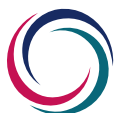

## Supporting Information

for

### **A fluorescent probe for detection of Hg<sup>2+</sup> ions constructed by tetramethyl cucurbit[6]uril and 1,2-bis(4-pyridyl)ethene**

Xiaoqian Chen, Naqin Yang, Yue Ma, Xinan Yang and Peihua Ma

*Beilstein J. Org. Chem.* **2023**, *19*, 864–872. doi:10.3762/bjoc.19.63

### **ITC exothermic isotherms of the interaction formed between G and TMeQ[6]**

## 1. Isothermal titration calorimetry

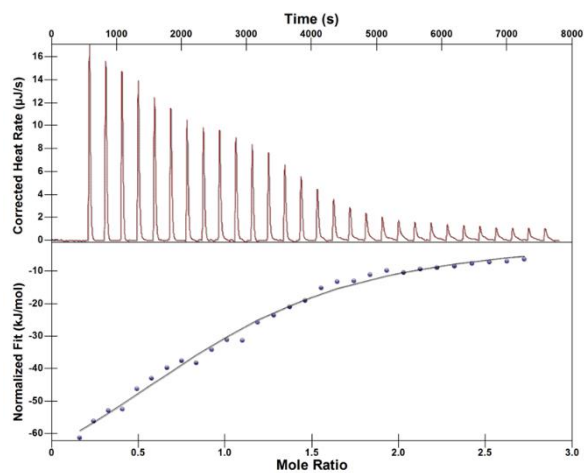

**Figure S1:** The ITC diagram of the TMeQ[6] to G.
